# Supplementary material for: Purification and Identification of Novel Antioxidant Peptides Isolated from Geoffroea decorticans Seeds with Anticoagulant Activity
Source: MDPI journal article supplement (doi:10.3390/pharmaceutics13081153), 2021-07-27
Supplement: s1 [file s1]

# Supplementary Information: Purification and Identification of Novel Antioxidant Peptides Isolated from *Geoffroea decorticans* Seeds with Anticoagulant Activity

Juliana Cotabarren, Brenda Ozón, Santiago Claver, Javier Garcia-Pardo and Walter David Obregón

**Table S1.** Protein sequences obtained from the NCBI database after performing an sequence similarity search for the peptides (b), (c) and (d).

| Organism                  | Query Cover | E Value            | Per. Ident. |
|---------------------------|-------------|--------------------|-------------|
| <i>Arachis duranensis</i> | 100%        | $1 \times e^{-6}$  | 93.33%      |
| <i>Arachis hypogaea</i>   | 100%        | $1 \times e^{-6}$  | 93.33%      |
| <i>Vigna unguiculata</i>  | 100%        | $2 \times e^{-5}$  | 86.67%      |
| <i>Vigna unguiculata</i>  | 100%        | $2 \times e^{-5}$  | 86.67%      |
| <i>Abrus precatorius</i>  | 100%        | $2 \times e^{-5}$  | 86.67%      |
| <i>Arachis hypogaea</i>   | 100%        | $2 \times e^{-9}$  | 94.44%      |
| <i>Arachis duranensis</i> | 94%         | $2 \times e^{-9}$  | 94.44%      |
| <i>Arachis hypogaea</i>   | 94%         | $2 \times e^{-9}$  | 94.44%      |
| <i>Prosopis alba</i>      | 100%        | $1 \times e^{-8}$  | 84.21%      |
| <i>Arachis duranensis</i> | 100%        | $2 \times e^{-6}$  | 84.21%      |
| <i>Arachis hypogaea</i>   | 100%        | $5 \times e^{-18}$ | 96%         |
| <i>Arachis hypogaea</i>   | 100%        | $5 \times e^{-18}$ | 96%         |
| <i>Arachis duranensis</i> | 100%        | $5 \times e^{-18}$ | 96%         |
| <i>Arachis ipaensis</i>   | 100%        | $5 \times e^{-18}$ | 96%         |
| <i>Arachis ipaensis</i>   | 100%        | $5 \times e^{-18}$ | 96%         |

**Citation:** Cotabarren, J.; Ozón, B.; Claver, S.; Garcia-Pardo, J.; Obregón, W.D. Purification and Identification of Novel Antioxidant Peptides Isolated from *Geoffroea decorticans* Seeds with Anticoagulant Activity. *Pharmaceutics* **2021**, *13*, 1153. <https://doi.org/10.3390/pharmaceutics13081153>

Academic Editor: Maria Rosaria Lauro

Received: 14 June 2021

Accepted: 22 July 2021

Published: 27 July 2021

**Publisher's Note:** MDPI stays neutral with regard to jurisdictional claims in published maps and institutional affiliations.

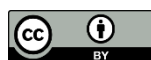

**Copyright:** © 2021 by the authors. Submitted for possible open access publication under the terms and conditions of the Creative Commons Attribution (CC BY) license (<http://creativecommons.org/licenses/by/4.0/>).
